# Supplementary material for: Effect of Fentanyl as an Adjuvant to Brachial Plexus Block for Upper Extremity Surgeries: A Systematic Review and Meta-Analysis of RCTs
Source: Pain Res Manag. 2022 Mar 19;2022:8704569. doi: 10.1155/2022/8704569 (PMC8957455; doi:10.1155/2022/8704569)
Supplement: Supplementary Materials — Supplemental Table 1: search strategy. Supplementary Table 2: GRADE assessment of the evidence. [file 8704569.f1.zip]

Archive with 2 entries (2 files):
- 8704569.f1/Supplementary Table 1.docx
- 8704569.f1/Supplementary table 2.docx
